# Supplementary material for: Moderate Static Magnetic Field (6 mT)-Induced Lipid Rafts Rearrangement Increases Silver NPs Uptake in Human Lymphocytes
Source: MDPI journal article supplement (doi:10.3390/molecules25061398), 2020-03-19
Supplement: s1 [file s1]

## Supplementary Material

Cultures of isolated PBLs show a progressive decrement due to spontaneous cell death unless they are supplemented with a mitogen, like PHA, able to transform large population of lymphocytes in mitotically active cells, and thus, they can be maintained in culture up to 1 week by preventing cell death. Without PHA about 20% of untreated PBLs died. However, if the trend of PBL viability is measured in the presence or absence of PHA (10 $\mu$ g/mL), the viability values are almost similar up to 18 h. The PHA supplemented PBLs remain more viable for the remaining days (Figure 1 Supplementary material).

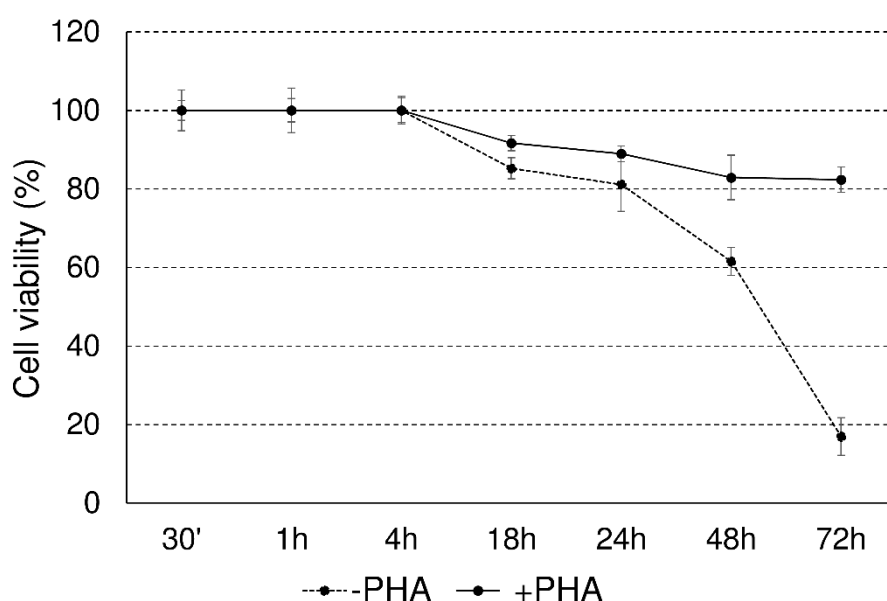

**Figure 1 Supplementary material.** Cell viability evaluated by MTT assay from 30 minutes to 72 h of PBLs supplemented with PHA (10 $\mu$ g/mL). All values are referred to the value of control PBLs at 0 h (before the start of time course), taken as 100%. Each error bar represents the SE of five independent experiments, performed in duplicate.

14. The exposure to 6 mT SMF of PHA treated PBLs does not improve cell viability of PBLs (Figure 2 Supplementary  
15 material).

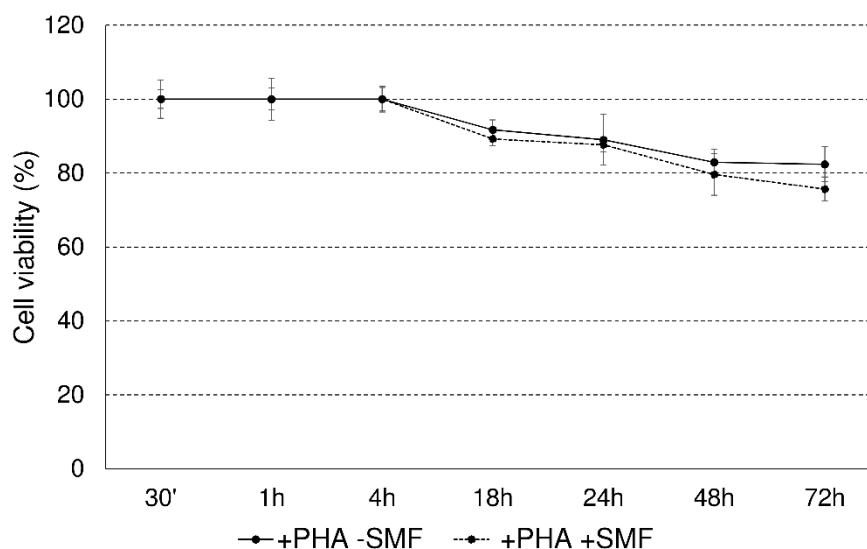

16.

17. **Figure 2 Supplementary material.** Cell viability evaluated by MTT assay from 30 minutes to 72 h of PBLs  
18 supplemented with PHA (10 µg/mL) in the presence and in the absence of 6 mT SMF. All values are referred to  
19 the value of control PBLs at 0 h (before the start of time course), taken as 100%. Each error bar represents the SE  
20 of five independent experiments, performed in duplicate.

21.

22. Figure 3 Supplementary material shows the uptake experiment using PBLs exposed to 6 mT SMF for 24h before  
23 incubation with AgNPs..

24 The results demonstrate that i) also after 24h of exposure to SMF before incubation with AgNPs, the uptake  
25 occurs via lipid raft- and clathrin-mediated endocytosis; ii) the exposure to 6 mT SMF favours AgNPs  
26 internalization and the efficiency of uptake is high at 1 h of AgNPs-G incubation; iii) the ratio of internalization  
27 at 24h is lower than one measured at 72h, thus supporting the evidence that AgNPs uptake occurs via rafts,  
28 whose presence on the plasma membrane is, in turn, increased by SMF exposure.

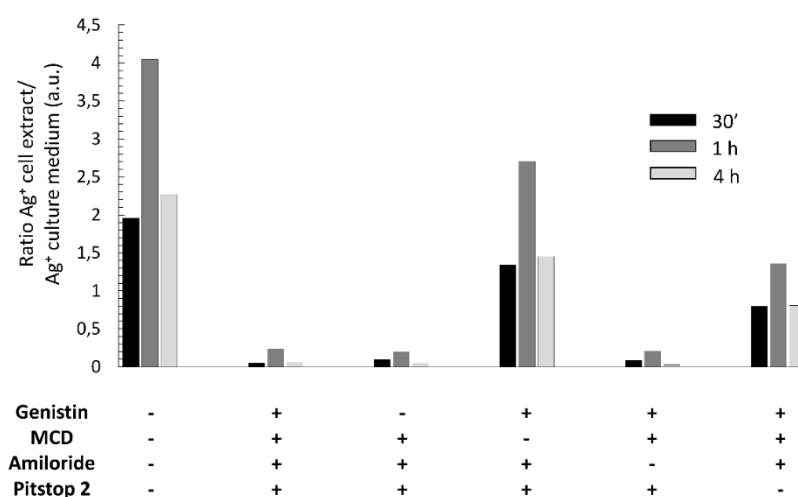

29

30

31 **Figure 3 Supplementary material.** ICP-OES analysis of the amount of AgNPs-G internalized by PBLs cells  
32 previously exposed to SMF for 24 h, treated with endocytic pathways selective inhibitors (Genistin, MCD,  
33 Amiloride, Pitstop 2) and further incubated with  $2 \times 10^3$  AgNPs-G for 30 min, 1 h and 4 h. Data are reported as  
34 ratio between the Ag<sup>+</sup> detected in cell extract and those detected in culture medium (absorbance in arbitrary  
35 unit, a.u.). (+) presence; (-) absence.

36
